# Supplementary material
Source: PubMed Central journal article supplement (PMC9237798)
Supplement: jamainternmed-e222141-s001.pdf [file jamainternmed-e222141-s001.pdf]

## Supplemental Online Content

Verma A, Huffman JE, Gao L, et al; for the VA Million Veteran Program COVID-19 Science Initiative. Association of kidney comorbidities and acute kidney failure with unfavorable outcomes after COVID-19 in individuals with the sickle cell trait. *JAMA Intern Med*. Published online June 27, 2022. doi:10.1001/jamainternmed.2022.2141

### **eMethods.**

**eFigure 1.** A Hybridization Intensity Distribution Plot of Human  $\beta$  Hemoglobin A (HbA, the wild type allele) and Hemoglobin S (HbS, the alternative sickle allele rs334) in a Representative Batch (probeset AX-42810399, MVP 1.0 Axiom Array; out of 161 batches) of 4353 MVP Participants

**eFigure 2.** LabWAS of rs334-T in the MVP

**eFigure 3.** Phenome-Wide Association Studies of the Hb C allele (rs33930165-T) in MVP Participants From AFR Ancestry

**eFigure 4.** Laboratory-Wide Association Studies of the Hb C allele (rs33930165-T) in MVP Participants From AFR Ancestry

**eAppendix.** VA Million Veteran Program COVID-19 Science Initiative Membership & Acknowledgements

This supplemental material has been provided by the authors to give readers additional information about their work.

## **eMethods**

### **COVID-19 Source Data and severity definition**

VA Informatics and Computing Infrastructure (VINCI) created a COVID-19 Shared Data Resource (SDR) during the April-August 2020 period, documenting information regarding conditions, laboratory measures, medications, and procedures pertaining to the COVID-19 pandemic. This database was hosted by the VA Phenomics Library, Centralized Interactive Phenomics Resource (CIPHER), and provisioned data access to users across the VA healthcare systems. The VA COVID-19 SDR group including the VA National Surveillance Team (NST) provided researchers with curated data extracted from electronic health records (EHR) of veterans, after stripping off identifiable elements, and ensuring data security by requiring restricted access to the data (<https://www.hsrp.research.va.gov/covid19.cfm>). The phenotyping activity was undertaken centrally by an experienced VA research team in order to ensure consistent applications of dates across the EHR tables, as well as to provide uniform definitions of events preceding and subsequent to COVID-19, in an effort to characterize the trajectory of COVID-19 and other diseases and conditions. VA-wide efforts describing these data are in the public domain<sup>21</sup>. Structured data obtained via CPT and ICD-9 or ICD-10 codes, deposited in the VA Corporate Data Warehouse (CDW), was boosted with rule-based unstructured events recorded in patient notes via natural language processing (NLP), as was described previously for other projects<sup>42</sup>. The purpose of NLP-boosting was to fill gaps in knowledge about the severity of the disease, as well as extract specific dates when procedures (e.g. intubation and extubation) were performed. These curated data were provisioned in the MVP study mart for COVID-19 in VINCI ensuring data security behind the VA firewall.

EHR data for COVID-19 severity and comorbidity assessment was obtained from the time of enrollment at a VA medical center through February 2021. All subjects from this study had their COVID-19 testing performed at the VA using PCR based methods<sup>18</sup>. The index date was

defined as a COVID-19 case date, and for a hospitalized patient this can be the admission date up to 15 days prior to the COVID-19 case date. The MVP Data Core and MVP COVID-19 study team created a COVID-19 Severity Scale variable adapting the WHO COVID-19 Disease Progression Scale<sup>19</sup>.

The severity of COVID-19 infection was characterized based on testing positive for COVID-19 by PCR, hospitalization within 30 days of index dates for COVID-19 infection, and severe COVID-19 infection which includes treatment by noninvasive mechanical ventilation (NIV), high flow oxygen supply, extracorporeal membrane oxygenation (ECMO), intubation, pressor support, and dialysis; and death within 30 days of index dates for COVID-19 infection<sup>19</sup>. Based on these criterias, we derived the following binary COVID-19 outcomes: (1) COVID-19 infectivity (COVID-19 positive vs. negative); (2) COVID-19 hospitalization (COVID-19 positive and hospitalized vs. COVID-19 positive but not hospitalized); (3) severe COVID-19 (COVID-19 severe cases based on WHO criteria described above vs. testing positive for COVID-19 but not severe); (4) death (death within 30 days of COVID-19 infection vs. all other COVID-19 test positives).

#### Electronic Health Records on MVP participants

The MVP, a large multi-ethnic genetic biobank of US Veterans supported by the VA office of Research and Development<sup>17</sup>, served as the primary cohort analyzed for this COVID-19 study. MVP began enrollment in 2011, with continued enrollment to include > 850,000 Veterans as of mid 2021, with >650,000 genotyped. Blood biospecimens were collected for DNA isolation and genotyping, and the biorepository was linked to Veterans' EHR data, which included diagnosis codes (International Classification of Diseases ninth [ICD-9] and tenth [ICD-10]) revisions, current procedural terminology codes (CPT). Clinical laboratory measures, and demographic, lifestyle, and imaging data<sup>43</sup> were also available for analysis. EHR data captured on participants

from the time of enrollment at a VA healthcare center through September 30, 2019 represented their pre-COVID status.

The single nucleotide polymorphism (SNP) data in the MVP cohort was generated using a custom Thermo Fisher axion genotyping platform called MVP 1.0. The quality control steps and genotyping imputation using 1000 Genomes cosmopolitan reference panel for the MVP cohort have been previously reported<sup>44</sup>. Harmonized ancestry, race and ethnicity (HARE) is a composite variable derived from a combination of self-reported survey information and genetically derived ancestry<sup>26</sup>, was employed as a proxy for population stratification and global ancestry. We focused on three major ancestral groups: African (AFR), Hispanic (HIS), and European (EUR). Either directly genotyped or imputed markers in the beta hemoglobin gene (rs334(T) and rs33930165) were extracted and utilized for association testing. rs334 refers to rs334(T) and will be used interchangeably in this report.

#### Phenome-wide association study (PheWAS) and Laboratory-wide association study (LabWAS) of pre-existing conditions with Hb alleles

For the PheWAS analysis on rs334 SNP, we used phecodes<sup>45</sup> and laboratory measures from the clinical data available prior to the onset of COVID-19 infection (Sept 2019). For each phecode, individuals who had 2 or more phecodes reported were defined as cases, whereas those with no instance of a phecode were defined as controls. We have previously shown that cases <200 could lead to low statistical power and higher type I error<sup>46</sup>, therefore, we applied the threshold of 200 cases in each ancestry and excluded any phecode that was below that limit. This approach resulted in 1,618 (EUR), 1289 (AFR), 994 (HIS), 293 (ASN) phecodes being analyzed. We included 65 common clinical laboratory test measures available on the MVP participants up to March 2019. We used the median from the complete history of laboratory values for each individual. Additionally, for each laboratory measure, we excluded extreme

values that were >3 standard deviations from the mean. Logistic regression was applied to phecode-based models, whereas linear regression was used for laboratory measures implemented in PLINK2<sup>47</sup>. Additionally, Firth regression was applied when the logistic regression model failed to converge for binary outcomes. All the regression models were adjusted for sex, age (at enrollment), quadratic term for age, and the first 20 principal components. Ancestry-specific PheWAS and LabWAS were performed in all four groups. We applied a Bonferroni correction to adjust for multiple hypothesis testing, and the threshold of significance was computed independently in each ancestry group.

### Phenotyping of pre- and post-index conditions for COVID-19

Pre-index conditions were extracted by applying natural language processing (NLP) on ICD codes/procedures codes/medications within 2 years prior to the index date of COVID-19 diagnosis. Similar processes were used to extract post-index conditions 60 days after the index date. Pre-index renal impairments included acute renal failure (AKF2yr), prior end stage renal failure (AKIpeakmodifiedstage= priorEndStageRenalDisease), chronic kidney disease (CKD2yr), chronic kidney failure (CKF2yr), and nephrosis (Nephrosis2yr). The post-index conditions we studied included acute kidney failure (AKF60d), acute myocardial infarction (AMI60d) and a worsening trend of renal functions (postindex AKIpeakmodifiedstage= 1, 2, or 3) from a patient cohort with stable renal function pre-index (preindex AKIpeakmodifiedstage= 0).

### **Stages of Acute Kidney Disease (Akipeakmodifiedstage)**

Akipeakmodifiedstage is defined by the following: we take every creatinine in the index periods of interest and compare with the average baseline creatinine values from the one year baseline period preceding the index period. And then we take the patient's maximum stage.

If creatinine / baseline creatinine  $\geq$  3.0 then Stage 3

If creatinine / baseline creatinine  $\geq$  2.0 then Stage 2

If creatinine / baseline creatinine  $\geq$  1.5 then Stage 1

If creatinine – baseline creatinine  $\geq$  0.3 then Stage 1

If a patient is undergoing dialysis in the index period of interest, it is defined as Stage 3.

Stage “PriorESRD” refers to patients that had eGFR values from baseline that averaged  $<15$ , or prior history of dialysis or prior history of renal transplant.

Stage “Unknown” is defined as missing either baseline creatinine (results in the one year before index periods of interest) and/or missing the creatinine level in the index period of interest. AKI stage is assigned by comparing baseline to index period of interest so without both values the algorithm will not set an AKI stage

## **Statistical methods**

Firth logistic regression<sup>23,24</sup> implemented with the R package “brglm2” (version 0.7.1)<sup>25</sup> was used to examine the association between Hb alleles and COVID-19 outcomes, and ancestry-specific analyses were performed. All models were adjusted for age, age<sup>2</sup>, sex, and 20 ethnicity-specific principal components. Adjusted odds ratios (OR) of each copy of Hb allele were reported for the outcomes in each ethnicity, when applicable. The resulting ORs were meta-analyzed across ethnicity groups using random-effects meta-analysis as implemented in the R package “metafor” (version 2.4-0)<sup>28</sup>.

In the analysis of AKF60d, we adjusted for the presence of pre-index renal impairments or a worsening trend of renal functions or End Stage Renal Failure (ESRD) (post-index AKIpeakmodifiedstage= 1,2,or 3 or priorESRD plus post-index AKIpeakmodifiedstage= unknown were excluded).

In the analysis of a worsening trend of renal functions (postindex AKIpeakmodifiedstage= 1,2,or 3), we only focused on patients with pre-index AKIpeakmodifiedstage=0 and excluded participants of pre-index AKIpeakmodifiedstage= unknown or priorESRD).

For each post-index code, we first tested whether COVID-19 infection modified the effect of the SCT on the condition. If the interaction term was statistically significant at  $\alpha < 0.05$ , then COVID-19 infection was interpreted to be an effect modifier. The final model for inference included the interaction term and four ORs for the condition were reported: 1) SCT+ vs. SCT- in COVID-19 positive patients, SCT+ vs. SCT- in COVID-19 negative patients, 2) COVID-19 positive vs. COVID-19 negative in SCT+ patients, and 3) COVID-19 positive vs. COVID-19 negative in SCT- patients. If the interaction term was not statistically significant at alpha level of 0.05, then the final model for inference did not include the interaction term and two ORs for the condition were reported: SCT+ vs. SCT-, and COVID-19 positive vs. COVID-19 negative.

### **Mediation analysis**

We used counterfactual mediation modeling to investigate whether specific conditions which arose post-COVID-19 in SCT individuals caused mortality. We examined two candidates for potential mediation of the COVID-19 death by the SCT: post-index AKF60d and AMI60d in the AFR ancestral group. We used the mediation framework implemented in R (v3.6.1) (<https://www.R-project.org/>), mediation package version 4.5.0<sup>48</sup>, to estimate the direct and indirect effects for each mediator separately. The mediator model (with the mediator as the dependent variable and SCT as an independent variable) and the outcome model (with death as the dependent variable, SCT as independent variable and the mediator) both adjust for age, quadratic term of age, sex, and first 20 ethnicity-specific principal components. We used 10,000 simulations to report estimates and 95% confidence intervals. Because of the random

component of the mediation analysis, for each postindex condition mediation analysis was performed with 3 different random seeds. They all produce similar estimates.

## **More details on PheWAS and LabWAS results and discussion**

### *PheWAS*

At 1.6% allele frequency of the HbS variant (rs334) among participants of AFR ancestry, we identified 31 phenotypes with significant association ( $p_{\text{adjusted}} < 1.48 \times 10^{-05}$ ). In HIS and EUR participants, there were six phenotypic associations ( $p_{\text{adjusted}} < 1.95 \times 10^{-05}$ ), and one association ( $p_{\text{adjusted}} < 3.09 \times 10^{-05}$ ), respectively (Figure 2, eTable 3).

Fewer conditions were identified among HIS participants, such as chronic kidney disease ( $OR_{\text{HIS}} = 2.3 [1.7 - 3.2]$ ,  $p_{\text{HIS}} = 3.04 \times 10^{-08}$ ) and hypertensive chronic kidney disease ( $OR_{\text{HIS}} = 2.14 [1.55 - 2.98]$ ,  $p_{\text{HIS}} = 4.5 \times 10^{-06}$ ). Notably, both these conditions show ~60% more risk among HIS than AFR ancestry participants. However, it is important to note that the sample size of HIS group is much smaller with wider confidence intervals. Among EUR, hereditary hemolytic anemia was the only significant association (phecode: 282;  $OR = 14.7 [8.11 - 26.6]$ ,  $p = 8.76 \times 10^{-19}$ ), which was observed among AFR as well ( $OR = 10.3 [9.5 - 11.2]$ ,  $p = 1 \times 10^{-300}$ ).

### *LabWAS*

We identified 11/64 in EUR, 39/61 in AFR, 17/53 in HIS significant associations with rs334(T). A decrease in mean corpuscular hemoglobin (MCH) levels had the most significant association across all the ancestry groups (Figure 3, eTable 4). Additional associations with several red blood cell traits previously reported in other studies<sup>11,29</sup>, such as mean corpuscular volume (MCV), mean corpuscular hemoglobin concentration (MCHC), hemoglobin, hematocrit, and red blood cell width were observed (Figure 3, eTable 4).

Lymphopenia is an adverse prognostic factor for COVID-19 infection at the time of



diagnosis<sup>49,50</sup>, and in our study we observed that rs334 associated with a decreased lymphocyte fraction (units are percent) in AFR (beta = -2.68, p = 2.11 x 10<sup>-133</sup>), HIS (beta = -2.66, p = 7.74 x 10<sup>-12</sup>), and EUR (beta = -1.95, p = 1.06 x 10<sup>-05</sup>).

### Additional References

42. Knight KE, Honerlaw J, Danciu I, et al; VA Million Veteran Program. Standardized architecture for a mega-biobank phenomic library: the Million Veteran Program (MVP). *AMIA Jt Summits Transl Sci Proc.* 2020;2020:326-334. Medline:32477652</jrn>
43. Hunter-Zinck H, Shi Y, Li M, et al; VA Million Veteran Program. Genotyping array design and data quality control in the Million Veteran Program. *Am J Hum Genet.* 2020;106(4):535-548. Medline:32243820 doi:10.1016/j.ajhg.2020.03.004
44. Denny JC, Ritchie MD, Basford MA, et al. PheWAS: demonstrating the feasibility of a phenome-wide scan to discover gene-disease associations. *Bioinformatics.* 2010;26(9):1205-1210. Medline:20335276 doi:10.1093/bioinformatics/btq126
45. Verma A, Bradford Y, Dudek S, et al. A simulation study investigating power estimates in phenome-wide association studies. *BMC Bioinformatics.* 2018;19(1):120. Medline:29618318 doi:10.1186/s12859-018-2135-0
46. Chang CC, Chow CC, Tellier LC, Vattikuti S, Purcell SM, Lee JJ. Second-generation PLINK: rising to the challenge of larger and richer datasets. *Gigascience.* 2015;4:7. Medline:25722852 doi:10.1186/s13742-015-0047-8
47. Tingley D, Yamamoto T, Hirose K, Keele L, Imai K. mediation: RPackage for causal mediation analysis. *J Stat Softw.* 2014;59(5). doi:10.18637/jss.v059.i05
48. Gautret P, Million M, Jarrot PA, et al. Natural history of COVID-19 and therapeutic options. *Expert Rev Clin Immunol.* 2020;16(12):1159-1184. Medline:33356661 doi:10.1080/1744666X.2021.1847640
49. Zhao Q, Meng M, Kumar R, et al. Lymphopenia is associated with severe coronavirus disease 2019 (COVID-19) infections: a systemic review and meta-analysis. *Int J Infect Dis.* 2020;96:131-135. Medline:32376308 doi:10.1016/j.ijid.2020.04.086

**eFigure 1.** A hybridization intensity distribution plot of human beta hemoglobin A (HbA, the wild type allele) and hemoglobin S (HbS, the alternative sickle allele rs334) in a representative batch (probeset AX-42810399, MVP 1.0 Axiom Array; out of 161 batches) of 4353 MVP participants. The expected location of a HbS/S homozygote is circled. Review of all 161 batches from MVP revealed there was no HbS/S in the study population.

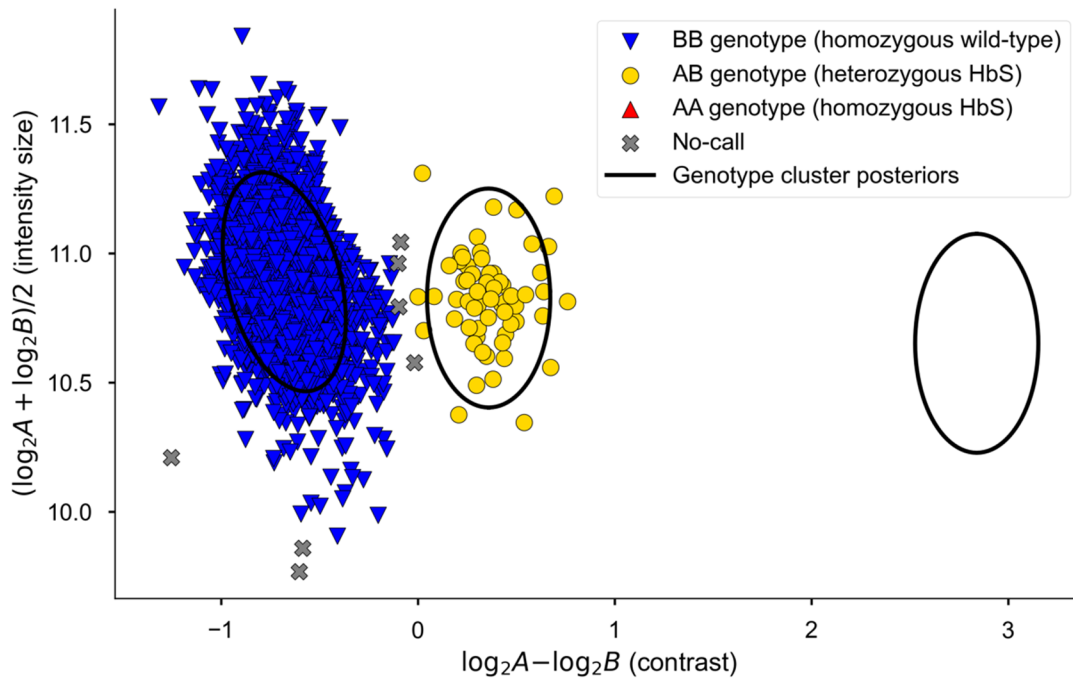

**eFigure 2.** LabWAS of rs334-T in the MVP. A plot showing the associations of rs334-T and the median value of 65 laboratory measures. a) The panel shows the  $-\log_{10}$  (p-value) on the y-axis and lab descriptions on the x-axis. Triangles pointing up have increasing effects, and triangles pointing down have decreasing effects. The colors represent the different ancestry groups. b) The plot shows beta from the regression model for each laboratory measure. The significant results are highlighted in colors corresponding to ancestry groups, and other results are plotted in grey.

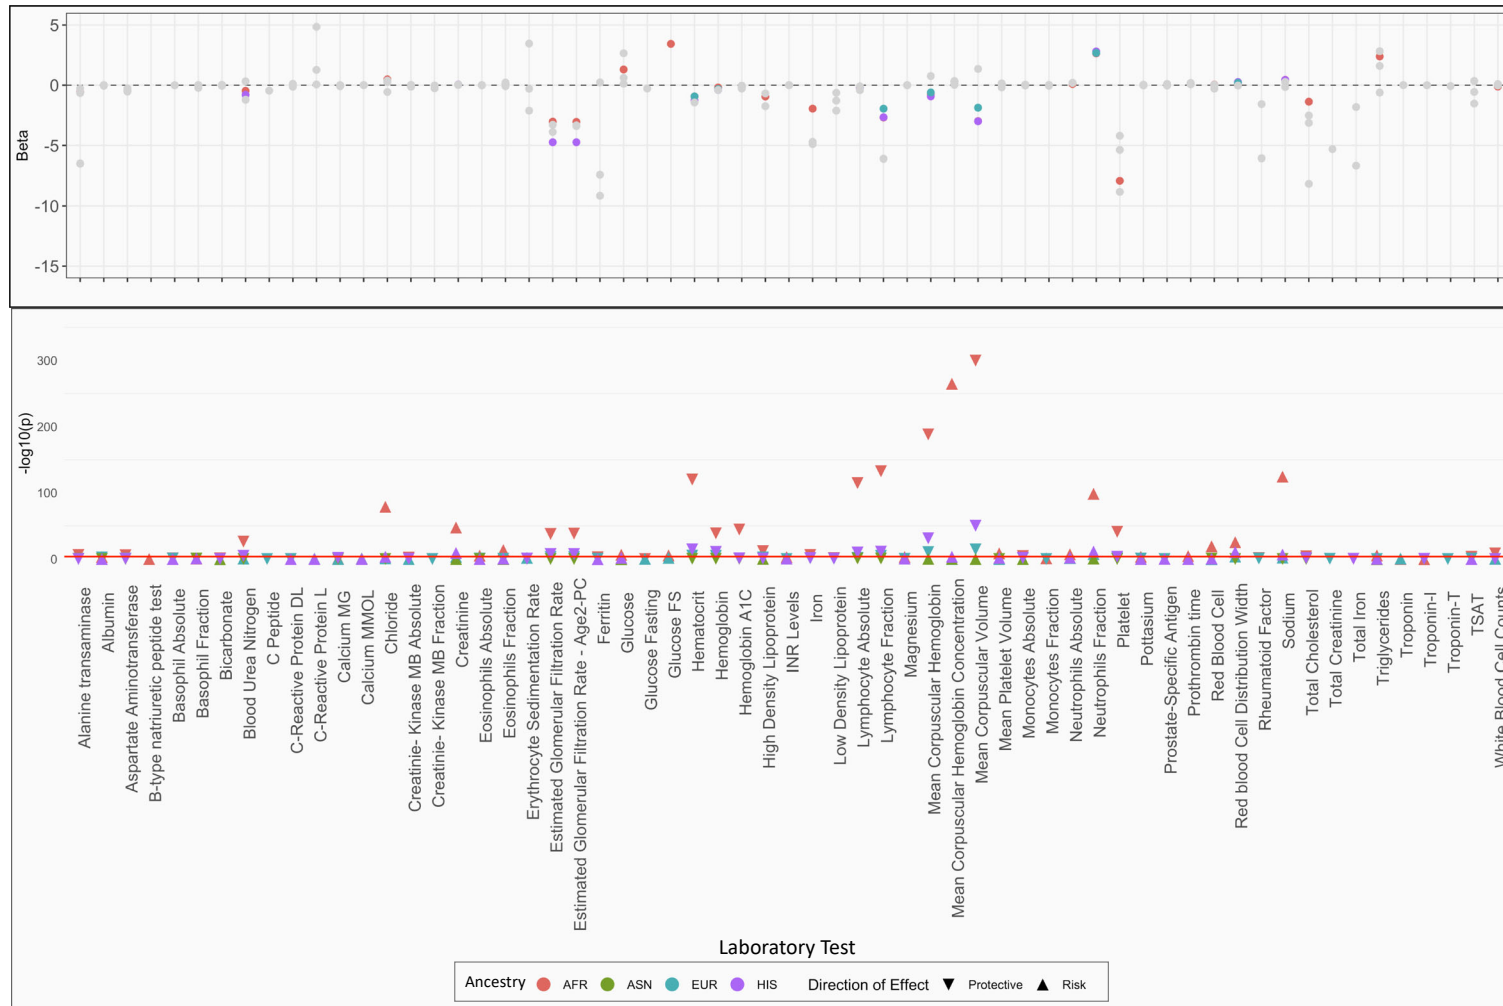

**eFigure 3.** Phenome-wide association studies of the Hb C allele (rs33930165-T) in MVP participants from AFR ancestry.

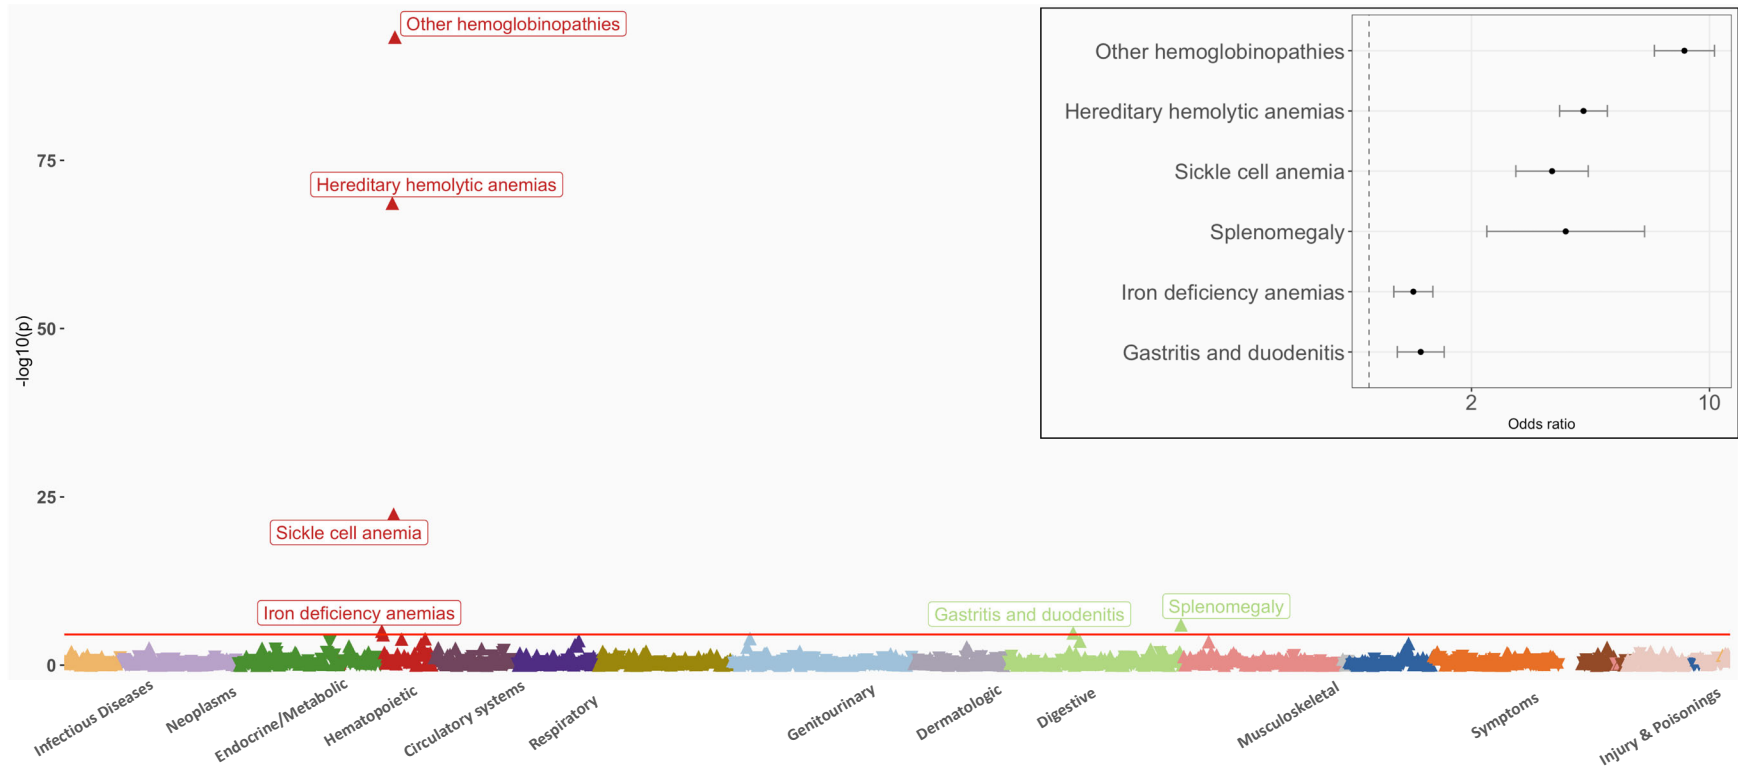

**eFigure 4.** Laboratory-wide association studies of the Hb C allele (rs33930165-T) in MVP participants from AFR ancestry.

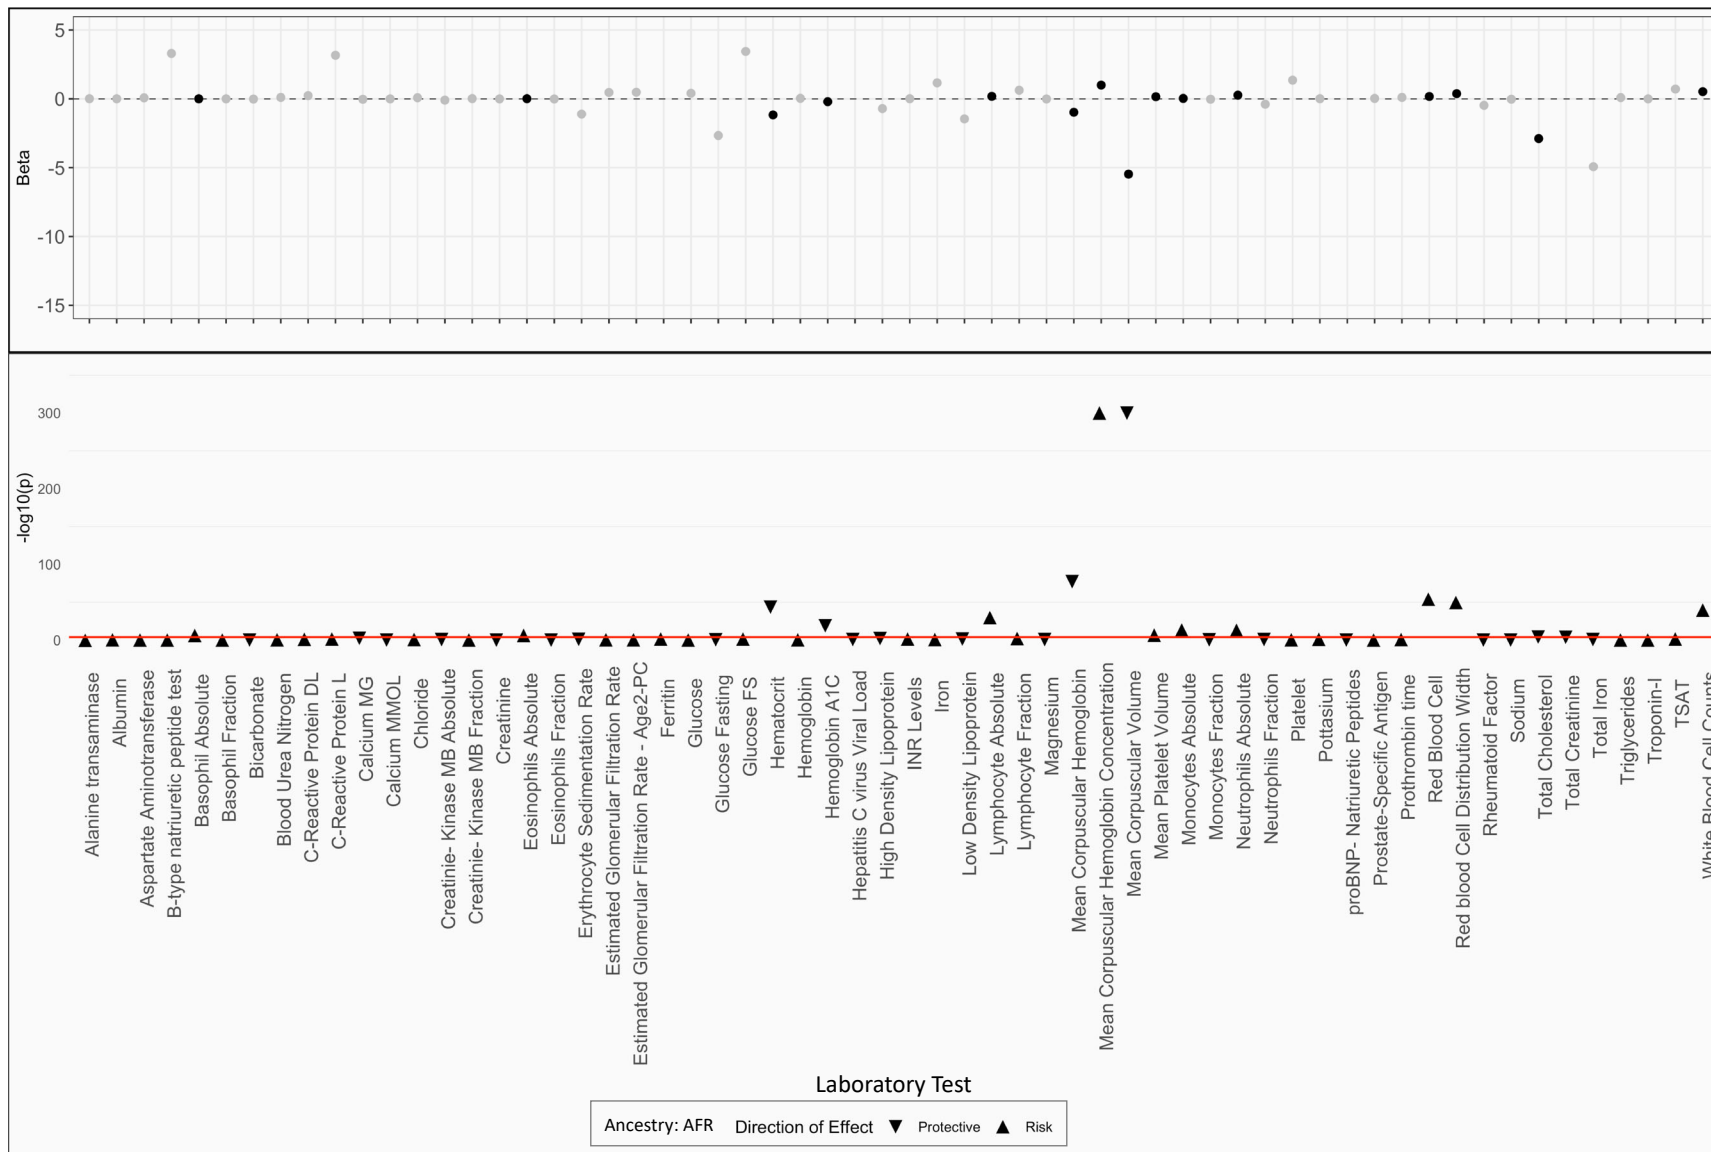

## **eAppendix. VA Million Veteran Program COVID-19 Science Initiative Membership & Acknowledgements**

### **VA Million Veteran Program COVID-19 Science Initiative**

#### **MVP COVID-19 Science Program Steering Committee**

- Christopher J. O'Donnell, M.D., M.P.H. (Co-Chair)  
VA Boston Healthcare System, 150 S. Huntington Avenue, Boston, MA 02130
- J. Michael Gaziano, M.D., M.P.H. (Co-Chair)  
VA Boston Healthcare System, 150 S. Huntington Avenue, Boston, MA 02130
- Philip S. Tsao, Ph.D. (Co-Chair)  
VA Palo Alto Health Care System, 3801 Miranda Avenue, Palo Alto, CA 94304
- Sumitra Muralidhar, Ph.D.  
US Department of Veterans Affairs, 810 Vermont Avenue NW, Washington, DC 20420
- Jean Beckham, Ph.D.  
Durham VA Medical Center, 508 Fulton Street, Durham, NC 27705
- Kyong-Mi Chang, M.D.  
Philadelphia VA Medical Center, 3900 Woodland Avenue, Philadelphia, PA 19104
- Juan P. Casas, M.D., Ph.D.  
VA Boston Healthcare System, 150 S. Huntington Avenue, Boston, MA 02130
- Kelly Cho, M.P.H., Ph.D.  
VA Boston Healthcare System, 150 S. Huntington Avenue, Boston, MA 02130
- Saiju Pyarajan, Ph.D.  
VA Boston Healthcare System, 150 S. Huntington Avenue, Boston, MA 02130
- Jennifer Huffman, Ph.D.  
VA Boston Healthcare System, 150 S. Huntington Avenue, Boston, MA 02130
- Jennifer Moser, Ph.D.  
US Department of Veterans Affairs, 810 Vermont Avenue NW, Washington, DC 20420

#### **MVP COVID-19 Science Program Steering Committee Support**

- Lauren Thomann, M.P.H. (P&P Committee Representative, Working Group Coordinator)  
VA Boston Healthcare System, 150 S. Huntington Avenue, Boston, MA 02130
- Helene Garcon, M.D. (Program Coordinator, Working Group Coordinator)  
VA Boston Healthcare System, 150 S. Huntington Avenue, Boston, MA 02130
- Nicole Kosik, M.P.H. (Working Group Coordinator)  
VA Boston Healthcare System, 150 S. Huntington Avenue, Boston, MA 02130

#### **MVP COVID-19 Science Program Working Groups and Associated Chairs**

- COVID-19 Related PheWAS
  - o Katherine Liao, M.D.  
VA Boston Healthcare System, 150 S. Huntington Avenue, Boston, MA 02130
  - o Scott Damrauer, M.D.  
Philadelphia VA Medical Center, 3900 Woodland Avenue, Philadelphia, PA 19104
- Disease Mechanisms

- Richard Hauger, M.D.  
VA San Diego Healthcare System, 3350 La Jolla Village Drive, San Diego, CA 92161
- Shih-Wen Luoh, M.D., Ph.D.  
Portland VA Medical Center, 3710 SW U.S. Veterans Hospital Road, Portland, OR 97239
- Sudha Iyengar, Ph.D.  
VA Northeast Ohio Healthcare System, 10701 East Boulevard, Cleveland, OH 44106
- Druggable Genome
  - Juan P. Casas, M.D., Ph.D.  
VA Boston Healthcare System, 150 S. Huntington Avenue, Boston, MA 02130
- Genomics for Risk Prediction, PRS, and MR
  - Themistocles Assimes, M.D., Ph.D.  
VA Palo Alto Health Care System, 3801 Miranda Avenue, Palo Alto, CA 94304
  - Panagiotis Roussos, M.D., Ph.D.  
James J. Peters VA Medical Center, 130 W Kingsbridge Rd, Bronx, NY 10468
  - Robert Striker, M.D., Ph.D.  
William S. Middleton Memorial Veterans Hospital, 2500 Overlook Terrace, Madison, WI 53705
- GWAS & Downstream Analysis
  - Jennifer Huffman, Ph.D.  
VA Boston Healthcare System, 150 S. Huntington Avenue, Boston, MA 02130
  - Yan Sun, Ph.D.  
Atlanta VA Medical Center, 1670 Clairmont Road, Decatur, GA 30033
- Pharmacogenomics
  - Adriana Hung, M.D., M.P.H.  
VA Tennessee Valley Healthcare System, 1310 24th Avenue, South Nashville, TN 37212
  - Sony Tuteja, Pharm.D., M.S.  
Philadelphia VA Medical Center, 3900 Woodland Avenue, Philadelphia, PA 19104
- VA COVID-19 Shared Data Resource – Scott L. DuVall, Ph.D.; Kristine E. Lynch, Ph.D.; Elise Gatsby, M.P.H.  
VA Informatics and Computing Infrastructure (VINCI), VA Salt Lake City Health Care System, 500 Foothill Drive, Salt Lake City, UT 84148
- MVP COVID-19 Data Core – Kelly Cho, M.P.H., Ph.D.; Lauren Costa, M.P.H.; Anne Yuk-Lam Ho, M.P.H.; Rebecca Song, M.P.H.  
VA Boston Healthcare System, 150 S. Huntington Avenue, Boston, MA 02130

### **VA Million Veteran Program**

#### **MVP Executive Committee**

- Co-Chair: J. Michael Gaziano, M.D., M.P.H.

- VA Boston Healthcare System, 150 S. Huntington Avenue, Boston, MA 02130
- Co-Chair: Sumitra Muralidhar, Ph.D.  
US Department of Veterans Affairs, 810 Vermont Avenue NW, Washington, DC 20420
- Rachel Ramoni, D.M.D., Sc.D., Chief VA Research and Development Officer  
US Department of Veterans Affairs, 810 Vermont Avenue NW, Washington, DC 20420
- Jean Beckham, Ph.D.  
Durham VA Medical Center, 508 Fulton Street, Durham, NC 27705
- Kyong-Mi Chang, M.D.  
Philadelphia VA Medical Center, 3900 Woodland Avenue, Philadelphia, PA 19104
- Christopher J. O'Donnell, M.D., M.P.H.  
VA Boston Healthcare System, 150 S. Huntington Avenue, Boston, MA 02130
- Philip S. Tsao, Ph.D.  
VA Palo Alto Health Care System, 3801 Miranda Avenue, Palo Alto, CA 94304
- James Breeling, M.D., Ex-Officio  
US Department of Veterans Affairs, 810 Vermont Avenue NW, Washington, DC 20420
- Grant Huang, Ph.D., Ex-Officio  
US Department of Veterans Affairs, 810 Vermont Avenue NW, Washington, DC 20420
- Juan P. Casas, M.D., Ph.D., Ex-Officio  
VA Boston Healthcare System, 150 S. Huntington Avenue, Boston, MA 02130

#### **MVP Program Office**

- Sumitra Muralidhar, Ph.D.  
US Department of Veterans Affairs, 810 Vermont Avenue NW, Washington, DC 20420
- Jennifer Moser, Ph.D.  
US Department of Veterans Affairs, 810 Vermont Avenue NW, Washington, DC 20420

#### **MVP Recruitment/Enrollment**

- Recruitment/Enrollment Director/Deputy Director, Boston – Stacey B. Whitbourne, Ph.D.;  
Jessica V. Brewer, M.P.H.  
VA Boston Healthcare System, 150 S. Huntington Avenue, Boston, MA 02130
- MVP Coordinating Centers
  - o Clinical Epidemiology Research Center (CERC), West Haven – Mihaela Aslan, Ph.D.  
West Haven VA Medical Center, 950 Campbell Avenue, West Haven, CT 06516
  - o Cooperative Studies Program Clinical Research Pharmacy Coordinating Center, Albuquerque – Todd Connor, Pharm.D.; Dean P. Argyres, B.S., M.S.  
New Mexico VA Health Care System, 1501 San Pedro Drive SE, Albuquerque, NM 87108
  - o Genomics Coordinating Center, Palo Alto – Philip S. Tsao, Ph.D.  
VA Palo Alto Health Care System, 3801 Miranda Avenue, Palo Alto, CA 94304
  - o MVP Boston Coordinating Center, Boston - J. Michael Gaziano, M.D., M.P.H.  
VA Boston Healthcare System, 150 S. Huntington Avenue, Boston, MA 02130
  - o MVP Information Center, Canandaigua – Brady Stephens, M.S.  
Canandaigua VA Medical Center, 400 Fort Hill Avenue, Canandaigua, NY 14424



- VA Central Biorepository, Boston – Mary T. Brophy M.D., M.P.H.; Donald E. Humphries, Ph.D.; Luis E. Selva, Ph.D.  
VA Boston Healthcare System, 150 S. Huntington Avenue, Boston, MA 02130
- MVP Informatics, Boston – Nhan Do, M.D.; Shahpoor (Alex) Shayan, M.S.  
VA Boston Healthcare System, 150 S. Huntington Avenue, Boston, MA 02130
- MVP Data Operations/Analytics, Boston – Kelly Cho, M.P.H., Ph.D.  
VA Boston Healthcare System, 150 S. Huntington Avenue, Boston, MA 02130
- Director of Regulatory Affairs – Lori Churby, B.S.  
VA Palo Alto Health Care System, 3801 Miranda Avenue, Palo Alto, CA 94304

### **MVP Science**

- Science Operations – Christopher J. O’Donnell, M.D., M.P.H.  
VA Boston Healthcare System, 150 S. Huntington Avenue, Boston, MA 02130
- Genomics Core - Christopher J. O’Donnell, M.D., M.P.H.  
VA Boston Healthcare System, 150 S. Huntington Avenue, Boston, MA 02130  
Saiju Pyarajan Ph.D.  
VA Boston Healthcare System, 150 S. Huntington Avenue, Boston, MA 02130  
Philip S. Tsao, Ph.D.  
VA Palo Alto Health Care System, 3801 Miranda Avenue, Palo Alto, CA 94304
- Data Core - Kelly Cho, M.P.H, Ph.D.  
VA Boston Healthcare System, 150 S. Huntington Avenue, Boston, MA 02130
- VA Informatics and Computing Infrastructure (VINCI) – Scott L. DuVall, Ph.D.  
VA Salt Lake City Health Care System, 500 Foothill Drive, Salt Lake City, UT 84148
- Data and Computational Sciences – Saiju Pyarajan, Ph.D.  
VA Boston Healthcare System, 150 S. Huntington Avenue, Boston, MA 02130
- Statistical Genetics – Elizabeth Hauser, Ph.D.  
Durham VA Medical Center, 508 Fulton Street, Durham, NC 27705  
Yan Sun, Ph.D.  
Atlanta VA Medical Center, 1670 Clairmont Road, Decatur, GA 30033  
Hongyu Zhao, Ph.D.  
West Haven VA Medical Center, 950 Campbell Avenue, West Haven, CT 06516

### **Current MVP Local Site Investigators**

- Atlanta VA Medical Center (Peter Wilson, M.D.)  
1670 Clairmont Road, Decatur, GA 30033
- Bay Pines VA Healthcare System (Rachel McArdle, Ph.D.)  
10,000 Bay Pines Blvd Bay Pines, FL 33744
- Birmingham VA Medical Center (Louis Dellitalia, M.D.)  
700 S. 19th Street, Birmingham AL 35233
- Central Western Massachusetts Healthcare System (Kristin Mattocks, Ph.D., M.P.H.)  
421 North Main Street, Leeds, MA 01053
- Cincinnati VA Medical Center (John Harley, M.D., Ph.D.)  
3200 Vine Street, Cincinnati, OH 45220
- Clement J. Zablocki VA Medical Center (Jeffrey Whittle, M.D., M.P.H.)  
5000 West National Avenue, Milwaukee, WI 53295

- VA Northeast Ohio Healthcare System (Frank Jacono, M.D.)  
10701 East Boulevard, Cleveland, OH 44106
- Durham VA Medical Center (Jean Beckham, Ph.D.)  
508 Fulton Street, Durham, NC 27705
- Edith Nourse Rogers Memorial Veterans Hospital (John Wells., Ph.D.)  
200 Springs Road, Bedford, MA 01730
- Edward Hines, Jr. VA Medical Center (Salvador Gutierrez, M.D.)  
5000 South 5th Avenue, Hines, IL 60141
- Veterans Health Care System of the Ozarks (Gretchen Gibson, D.D.S., M.P.H.)  
1100 North College Avenue, Fayetteville, AR 72703
- Fargo VA Health Care System (Kimberly Hammer, Ph.D.)  
2101 N. Elm, Fargo, ND 58102
- VA Health Care Upstate New York (Laurence Kaminsky, Ph.D.)  
113 Holland Avenue, Albany, NY 12208
- New Mexico VA Health Care System (Gerardo Villareal, M.D.)  
1501 San Pedro Drive, S.E. Albuquerque, NM 87108
- VA Boston Healthcare System (Scott Kinlay, M.B.B.S., Ph.D.)  
150 S. Huntington Avenue, Boston, MA 02130
- VA Western New York Healthcare System (Junzhe Xu, M.D.)  
3495 Bailey Avenue, Buffalo, NY 14215-1199
- Ralph H. Johnson VA Medical Center (Mark Hamner, M.D.)  
109 Bee Street, Mental Health Research, Charleston, SC 29401
- Columbia VA Health Care System (Roy Mathew, M.D.)  
6439 Garners Ferry Road, Columbia, SC 29209
- VA North Texas Health Care System (Sujata Bhushan, M.D.)  
4500 S. Lancaster Road, Dallas, TX 75216
- Hampton VA Medical Center (Pran Iruvanti, D.O., Ph.D.)  
100 Emancipation Drive, Hampton, VA 23667
- Richmond VA Medical Center (Michael Godschalk, M.D.)  
1201 Broad Rock Blvd., Richmond, VA 23249
- Iowa City VA Health Care System (Zuhair Ballas, M.D.)  
601 Highway 6 West, Iowa City, IA 52246-2208
- Eastern Oklahoma VA Health Care System (Douglas Ivins, M.D.)  
1011 Honor Heights Drive, Muskogee, OK 74401
- James A. Haley Veterans' Hospital (Stephen Mastorides, M.D.)  
13000 Bruce B. Downs Blvd, Tampa, FL 33612
- James H. Quillen VA Medical Center (Jonathan Moorman, M.D., Ph.D.)  
Corner of Lamont & Veterans Way, Mountain Home, TN 37684
- John D. Dingell VA Medical Center (Saib Gappy, M.D.)  
4646 John R Street, Detroit, MI 48201
- Louisville VA Medical Center (Jon Klein, M.D., Ph.D.)  
800 Zorn Avenue, Louisville, KY 40206
- Manchester VA Medical Center (Nora Ratcliffe, M.D.)  
718 Smyth Road, Manchester, NH 03104

- Miami VA Health Care System (Hermes Florez, M.D., Ph.D.)  
1201 NW 16th Street, 11 GRC, Miami FL 33125
- Michael E. DeBakey VA Medical Center (Olaoluwa Okusaga, M.D.)  
2002 Holcombe Blvd, Houston, TX 77030
- Minneapolis VA Health Care System (Maureen Murdoch, M.D., M.P.H.)  
One Veterans Drive, Minneapolis, MN 55417
- N. FL/S. GA Veterans Health System (Peruvemba Sriram, M.D.)  
1601 SW Archer Road, Gainesville, FL 32608
- Northport VA Medical Center (Shing Shing Yeh, Ph.D., M.D.)  
79 Middleville Road, Northport, NY 11768
- Overton Brooks VA Medical Center (Neeraj Tandon, M.D.)  
510 East Stoner Ave, Shreveport, LA 71101
- Philadelphia VA Medical Center (Darshana Jhala, M.D.)  
3900 Woodland Avenue, Philadelphia, PA 19104
- Phoenix VA Health Care System (Samuel Aguayo, M.D.)  
650 E. Indian School Road, Phoenix, AZ 85012
- Portland VA Medical Center (David Cohen, M.D.)  
3710 SW U.S. Veterans Hospital Road, Portland, OR 97239
- Providence VA Medical Center (Satish Sharma, M.D.)  
830 Chalkstone Avenue, Providence, RI 02908
- Richard Roudebush VA Medical Center (Suthat Liangpunsakul, M.D., M.P.H.)  
1481 West 10th Street, Indianapolis, IN 46202
- Salem VA Medical Center (Kris Ann Oursler, M.D.)  
1970 Roanoke Blvd, Salem, VA 24153
- San Francisco VA Health Care System (Mary Whooley, M.D.)  
4150 Clement Street, San Francisco, CA 94121
- South Texas Veterans Health Care System (Sunil Ahuja, M.D.)  
7400 Merton Minter Boulevard, San Antonio, TX 78229
- Southeast Louisiana Veterans Health Care System (Joseph Constans, Ph.D.)  
2400 Canal Street, New Orleans, LA 70119
- Southern Arizona VA Health Care System (Paul Meyer, M.D., Ph.D.)  
3601 S 6th Avenue, Tucson, AZ 85723
- Sioux Falls VA Health Care System (Jennifer Greco, M.D.)  
2501 W 22nd Street, Sioux Falls, SD 57105
- St. Louis VA Health Care System (Michael Rauchman, M.D.)  
915 North Grand Blvd, St. Louis, MO 63106
- Syracuse VA Medical Center (Richard Servatius, Ph.D.)  
800 Irving Avenue, Syracuse, NY 13210
- VA Eastern Kansas Health Care System (Melinda Gaddy, Ph.D.)  
4101 S 4th Street Trafficway, Leavenworth, KS 66048
- VA Greater Los Angeles Health Care System (Agnes Wallbom, M.D., M.S.)  
11301 Wilshire Blvd, Los Angeles, CA 90073
- VA Long Beach Healthcare System (Timothy Morgan, M.D.)  
5901 East 7th Street Long Beach, CA 90822

- VA Maine Healthcare System (Todd Stapley, D.O.)  
1 VA Center, Augusta, ME 04330
- VA New York Harbor Healthcare System (Scott Sherman, M.D., M.P.H.)  
423 East 23rd Street, New York, NY 10010
- VA Pacific Islands Health Care System (George Ross, M.D.)  
459 Patterson Rd, Honolulu, HI 96819
- VA Palo Alto Health Care System (Philip Tsao, Ph.D.)  
3801 Miranda Avenue, Palo Alto, CA 94304-1290
- VA Pittsburgh Health Care System (Patrick Strollo, Jr., M.D.)  
University Drive, Pittsburgh, PA 15240
- VA Puget Sound Health Care System (Edward Boyko, M.D.)  
1660 S. Columbian Way, Seattle, WA 98108-1597
- VA Salt Lake City Health Care System (Laurence Meyer, M.D., Ph.D.)  
500 Foothill Drive, Salt Lake City, UT 84148
- VA San Diego Healthcare System (Samir Gupta, M.D., M.S.C.S.)  
3350 La Jolla Village Drive, San Diego, CA 92161
- VA Sierra Nevada Health Care System (Mostaqul Huq, Pharm.D., Ph.D.)  
975 Kirman Avenue, Reno, NV 89502
- VA Southern Nevada Healthcare System (Joseph Fayad, M.D.)  
6900 North Pecos Road, North Las Vegas, NV 89086
- VA Tennessee Valley Healthcare System (Adriana Hung, M.D., M.P.H.)  
1310 24th Avenue, South Nashville, TN 37212
- Washington DC VA Medical Center (Jack Lichy, M.D., Ph.D.)  
50 Irving St, Washington, D. C. 20422
- W.G. (Bill) Hefner VA Medical Center (Robin Hurley, M.D.)  
1601 Brenner Ave, Salisbury, NC 28144
- White River Junction VA Medical Center (Brooks Robey, M.D.)  
163 Veterans Drive, White River Junction, VT 05009
- William S. Middleton Memorial Veterans Hospital (Robert Striker, M.D., Ph.D.)  
2500 Overlook Terrace, Madison, WI 53705
