# Supplementary material
Source: PubMed Central journal article supplement (PMC9237798)
Supplement: jamainternmed-e222141-s003.pdf [file jamainternmed-e222141-s003.pdf]

\*First name, last name, and suffix (if applicable) are required and will appear in PubMed.

| <b>*Group Name(s): VA Million Veteran Program COVID-19 Science Initiative</b> |                   |                              |                  |                                   |                                              |                                                         |                                                                                            |
|-------------------------------------------------------------------------------|-------------------|------------------------------|------------------|-----------------------------------|----------------------------------------------|---------------------------------------------------------|--------------------------------------------------------------------------------------------|
| <b>*First Name and Middle Initial(s)</b>                                      | <b>*Last Name</b> | <b>*Suffix (eg, Jr, III)</b> | Academic Degrees | Institution                       | Location (city, state/province, country)     | Role or Contribution, eg, chair, principal investigator | Group (if more than 1 Group listed in the byline) and/or Subgroup (eg, Steering Committee) |
| Sumitra                                                                       | Muralidhar        |                              | Ph.D.            | US Department of Veterans Affairs | 810 Vermont Avenue NW, Washington, DC 20420  | Committee Member                                        | <b>MVP COVID-19 Science Program Steering Committee</b>                                     |
| Jean                                                                          | Beckham           |                              | Ph.D.            | Durham VA Medical Center          | 508 Fulton Street, Durham, NC 27705          | Committee Member                                        | <b>MVP COVID-19 Science Program Steering Committee</b>                                     |
| Jennifer                                                                      | Moser             |                              | Ph.D.            | US Department of Veterans Affairs | 810 Vermont Avenue NW, Washington, DC 20420  | Committee Member                                        | <b>MVP COVID-19 Science Program Steering Committee</b>                                     |
| Lauren                                                                        | Thomann           |                              | M.P.H.           | VA Boston Healthcare System       | 150 S. Huntington Avenue, Boston, MA 02130   | Working Group Coordinator                               | <b>MVP COVID-19 Science Program Steering Committee Support</b>                             |
| Helene                                                                        | Garcon            |                              | M.D.             | VA Boston Healthcare System       | 150 S. Huntington Avenue, Boston, MA 02130   | Working Group Coordinator                               | <b>MVP COVID-19 Science Program Steering Committee Support</b>                             |
| Nicole                                                                        | Kosik             |                              | M.P.H.           | VA Boston Healthcare System       | 150 S. Huntington Avenue, Boston, MA 02130   | Working Group Coordinator                               | <b>MVP COVID-19 Science Program Steering Committee Support</b>                             |
| Scott D.                                                                      | Damrauer          |                              | M.D.             | Philadelphia VA Medical Center    | 3900 Woodland Avenue, Philadelphia, PA 19104 | Working Group Chair                                     | <b>MVP COVID-19 Science Program Working Groups and Associated Chairs</b>                   |

## Supplemental Online Content: Nonauthor Collaborators

\*First name, last name, and suffix (if applicable) are required and will appear in PubMed.

| *First Name and Middle Initial(s) | *Last Name | *Suffix (eg, Jr, III) | Academic Degrees | Institution                                     | Location (city, state/province, country)     | Role or Contribution, eg, chair, principal investigator | Group (if more than 1 Group listed in the byline) and/or Subgroup (eg, Steering Committee) |
|-----------------------------------|------------|-----------------------|------------------|-------------------------------------------------|----------------------------------------------|---------------------------------------------------------|--------------------------------------------------------------------------------------------|
| Themistocles                      | Assimes    |                       | M.D., Ph.D.      | VA Palo Alto Health Care System                 | 3801 Miranda Avenue, Palo Alto, CA 94304     | Working Group Chair                                     | <b>MVP COVID-19 Science Program Working Groups and Associated Chairs</b>                   |
| Panagiotis                        | Roussos    |                       | M.D., Ph.D.      | James J. Peters VA Medical Center               | 130 W Kingsbridge Rd, Bronx, NY 10468        | Working Group Chair                                     | <b>MVP COVID-19 Science Program Working Groups and Associated Chairs</b>                   |
| Robert                            | Striker    |                       | M.D., Ph.D.      | William S. Middleton Memorial Veterans Hospital | 2500 Overlook Terrace, Madison, WI 53705     | Working Group Chair                                     | <b>MVP COVID-19 Science Program Working Groups and Associated Chairs</b>                   |
| Sony                              | Tuteja     |                       | Pharm.D., M.S.   | Philadelphia VA Medical Center                  | 3900 Woodland Avenue, Philadelphia, PA 19104 | Working Group Chair                                     | <b>MVP COVID-19 Science Program Working Groups and Associated Chairs</b>                   |
| Scott L.                          | DuVall     |                       | Ph.D.            | VA Salt Lake City Health Care System            | 500 Foothill Drive, Salt Lake City, UT 84148 | VA Informatics and Computing Infrastructure             | VA COVID-19 Shared Data Resource                                                           |
| Kristine E.                       | Lynch      |                       | Ph.D.            | VA Salt Lake City Health Care System            | 500 Foothill Drive, Salt Lake City, UT 84148 | VA Informatics and Computing Infrastructure             | VA COVID-19 Shared Data Resource                                                           |
| Elise                             | Gatsby     |                       | M.P.H.           | VA Salt Lake City Health Care System            | 500 Foothill Drive, Salt Lake City, UT 84148 | VA Informatics and Computing Infrastructure             | VA COVID-19 Shared Data Resource                                                           |
| Rachel                            | Ramoni     |                       | D.M.D., Sc.D.    | US Department of Veterans Affairs               | 810 Vermont Avenue NW, Washington, DC 20420  | Committee Member                                        | <b>MVP Executive Committee</b>                                                             |

## Supplemental Online Content: Nonauthor Collaborators

\*First name, last name, and suffix (if applicable) are required and will appear in PubMed.

| *First Name and Middle Initial(s) | *Last Name | *Suffix (eg, Jr, III) | Academic Degrees | Institution                                                                      | Location (city, state/province, country)    | Role or Contribution, eg, chair, principal investigator | Group (if more than 1 Group listed in the byline) and/or Subgroup (eg, Steering Committee) |
|-----------------------------------|------------|-----------------------|------------------|----------------------------------------------------------------------------------|---------------------------------------------|---------------------------------------------------------|--------------------------------------------------------------------------------------------|
| James                             | Breeling   |                       | M.D.             | US Department of Veterans Affairs                                                | 810 Vermont Avenue NW, Washington, DC 20420 | Committee Member                                        | <b>MVP Executive Committee</b>                                                             |
| Grant                             | Huang      |                       | Ph.D.            | US Department of Veterans Affairs                                                | 810 Vermont Avenue NW, Washington, DC 20420 | Committee Member                                        | <b>MVP Executive Committee</b>                                                             |
| Stacey B.                         | Whitbourne |                       | Ph.D.            | VA Boston Healthcare System                                                      | 150 S. Huntington Avenue, Boston, MA 02130  |                                                         | <b>MVP Recruitment/Enrollment</b>                                                          |
| Jessica V.                        | Brewer     |                       | M.P.H.           | VA Boston Healthcare System                                                      | 150 S. Huntington Avenue, Boston, MA 02130  |                                                         | <b>MVP Recruitment/Enrollment</b>                                                          |
| Mihaela                           | Aslan      |                       | Ph.D.            | West Haven VA Medical Center                                                     | 950 Campbell Avenue, West Haven, CT 06516   |                                                         | MVP Coordinating Centers                                                                   |
| Todd                              | Connor     |                       | Pharm.D.         | Cooperative Studies Program<br>Clinical Research Pharmacy<br>Coordinating Center | Albuquerque                                 |                                                         | MVP Coordinating Centers                                                                   |
| Dean P.                           | Argyres    |                       | B.S., M.S.       | Cooperative Studies Program<br>Clinical Research Pharmacy<br>Coordinating Center | Albuquerque                                 |                                                         | MVP Coordinating Centers                                                                   |
| Brady                             | Stephens   |                       | M.S.             | Canandaigua VA Medical Center                                                    | 400 Fort Hill Avenue, Canandaigua, NY 14424 |                                                         | MVP Coordinating Centers                                                                   |
| Mary T.                           | Brophy     |                       | M.D.,<br>M.P.H.  | VA Boston Healthcare System                                                      | 150 S. Huntington Avenue, Boston, MA 02130  |                                                         | VA Central Biorepository, Boston                                                           |
| Donald E.                         | Humphries  |                       | Ph.D.            | VA Boston Healthcare System                                                      | 150 S. Huntington Avenue, Boston, MA 02130  |                                                         | VA Central Biorepository, Boston                                                           |
| Luis E.                           | Selva      |                       | Ph.D.            | VA Boston Healthcare System                                                      | 150 S. Huntington Avenue, Boston, MA 02130  |                                                         | VA Central Biorepository, Boston                                                           |

## Supplemental Online Content: Nonauthor Collaborators

\*First name, last name, and suffix (if applicable) are required and will appear in PubMed.

| *First Name and Middle Initial(s) | *Last Name | *Suffix (eg, Jr, III) | Academic Degrees | Institution                                     | Location (city, state/province, country)       | Role or Contribution, eg, chair, principal investigator | Group (if more than 1 Group listed in the byline) and/or Subgroup (eg, Steering Committee) |
|-----------------------------------|------------|-----------------------|------------------|-------------------------------------------------|------------------------------------------------|---------------------------------------------------------|--------------------------------------------------------------------------------------------|
| Nhan                              | Do         |                       | M.D.             | VA Boston Healthcare System                     | 150 S. Huntington Avenue, Boston, MA 02130     |                                                         | VA Central Biorepository, Boston                                                           |
| Shahpoor (Alex)                   | Shayan     |                       | M.S              | VA Boston Healthcare System                     | 150 S. Huntington Avenue, Boston, MA 02130     |                                                         | VA Central Biorepository, Boston                                                           |
| Lori                              | Churby     |                       | B.S.             | VA Boston Healthcare System                     | 150 S. Huntington Avenue, Boston, MA 02130     |                                                         | VA Central Biorepository, Boston                                                           |
| Elizabeth                         | Hauser     |                       | Ph.D.            | Durham VA Medical Center                        | 508 Fulton Street, Durham, NC 27705            |                                                         | MVP Science                                                                                |
| Hongyu                            | Zhao       |                       | Ph.D.            | West Haven VA Medical Center                    | 950 Campbell Avenue, West Haven, CT 06516      |                                                         | MVP Science                                                                                |
| Peter                             | Wilson     |                       | M.D.             | Atlanta VA Medical Center                       | 1670 Clairmont Road, Decatur, GA 30033         |                                                         | <b>MVP Local Site Investigators</b>                                                        |
| Rachel                            | McArdle    |                       | Ph.D.            | Bay Pines VA Healthcare System                  | 10,000 Bay Pines Blvd Bay Pines, FL 33744      |                                                         | <b>MVP Local Site Investigators</b>                                                        |
| Louis                             | Dellitalia |                       | M.D.             | Birmingham VA Medical Center                    | 700 S. 19th Street, Birmingham AL 35233        |                                                         | <b>MVP Local Site Investigators</b>                                                        |
| Kristin                           | Mattocks   |                       | Ph.D., M.P.H.    | Central Western Massachusetts Healthcare System | 421 North Main Street, Leeds, MA 01053         |                                                         | <b>MVP Local Site Investigators</b>                                                        |
| John                              | Harley     |                       | M.D., Ph.D.      | Cincinnati VA Medical Center                    | 3200 Vine Street, Cincinnati, OH 45220         |                                                         | <b>MVP Local Site Investigators</b>                                                        |
| Jeffrey                           | Whittle    |                       | M.D., M.P.H.     | Clement J. Zablocki VA Medical Center           | 5000 West National Avenue, Milwaukee, WI 53295 |                                                         | <b>MVP Local Site Investigators</b>                                                        |
| Frank                             | Jacono     |                       | M.D.             | VA Northeast Ohio Healthcare System             | 10701 East Boulevard, Cleveland, OH 44106      |                                                         | <b>MVP Local Site Investigators</b>                                                        |

## Supplemental Online Content: Nonauthor Collaborators

\*First name, last name, and suffix (if applicable) are required and will appear in PubMed.

| *First Name and Middle Initial(s) | *Last Name | *Suffix (eg, Jr, III) | Academic Degrees | Institution                                    | Location (city, state/province, country)                     | Role or Contribution, eg, chair, principal investigator | Group (if more than 1 Group listed in the byline) and/or Subgroup (eg, Steering Committee) |
|-----------------------------------|------------|-----------------------|------------------|------------------------------------------------|--------------------------------------------------------------|---------------------------------------------------------|--------------------------------------------------------------------------------------------|
| Jean                              | Beckham    |                       | Ph.D.            | Durham VA Medical Center                       | 508 Fulton Street, Durham, NC 27705                          |                                                         | <b>MVP Local Site Investigators</b>                                                        |
| John                              | Wells      |                       | Ph.D.            | Edith Nourse Rogers Memorial Veterans Hospital | 200 Springs Road, Bedford, MA 01730                          |                                                         | <b>MVP Local Site Investigators</b>                                                        |
| Salvador                          | Gutierrez  |                       | M.D.             | Edward Hines, Jr. VA Medical Center            | 5000 South 5th Avenue, Hines, IL 60141                       |                                                         | <b>MVP Local Site Investigators</b>                                                        |
| Gretchen                          | Gibson     |                       | D.D.S.M.P. H.    | Veterans Health Care System of the Ozarks      | 1100 North College Avenue, Fayetteville, AR 72703            |                                                         | <b>MVP Local Site Investigators</b>                                                        |
| Kimberly                          | Hammer     |                       | Ph.D.            | Fargo VA Health Care System                    | 2101 N. Elm, Fargo, ND 58102                                 |                                                         | <b>MVP Local Site Investigators</b>                                                        |
| Laurence                          | Kaminsky   |                       | Ph.D.            | VA Health Care Upstate New York                | 113 Holland Avenue, Albany, NY 12208                         |                                                         | <b>MVP Local Site Investigators</b>                                                        |
| Gerardo                           | Villareal  |                       | M.D.             | New Mexico VA Health Care System               | 1501 San Pedro Drive, S.E. Albuquerque, NM 87108             |                                                         | <b>MVP Local Site Investigators</b>                                                        |
| Scott                             | Kinlay     |                       | M.B.B.S., Ph.D.  | VA Boston Healthcare System                    | 150 S. Huntington Avenue, Boston, MA 02130                   |                                                         | <b>MVP Local Site Investigators</b>                                                        |
| Junzhe                            | Xu         |                       | M.D.             | VA Western New York Healthcare System          | 3495 Bailey Avenue, Buffalo, NY 14215-1199                   |                                                         | <b>MVP Local Site Investigators</b>                                                        |
| Mark                              | Hamner     |                       | M.D.             | Ralph H. Johnson VA Medical Center             | 109 Bee Street, Mental Health Research, Charleston, SC 29401 |                                                         | <b>MVP Local Site Investigators</b>                                                        |
| Roy                               | Mathew     |                       | M.D.             | Columbia VA Health Care System                 | 6439 Garners Ferry Road, Columbia, SC 29209                  |                                                         | <b>MVP Local Site Investigators</b>                                                        |

## Supplemental Online Content: Nonauthor Collaborators

\*First name, last name, and suffix (if applicable) are required and will appear in PubMed.

| *First Name and Middle Initial(s) | *Last Name | *Suffix (eg, Jr, III) | Academic Degrees | Institution                            | Location (city, state/province, country)                 | Role or Contribution, eg, chair, principal investigator | Group (if more than 1 Group listed in the byline) and/or Subgroup (eg, Steering Committee) |
|-----------------------------------|------------|-----------------------|------------------|----------------------------------------|----------------------------------------------------------|---------------------------------------------------------|--------------------------------------------------------------------------------------------|
| Sujata                            | Bhushan    |                       | M.D.             | VA North Texas Health Care System      | 4500 S. Lancaster Road, Dallas, TX 75216                 |                                                         | <b>MVP Local Site Investigators</b>                                                        |
| Pran                              | Iruvanti   |                       | D.O., Ph.D.      | Hampton VA Medical Center              | 100 Emancipation Drive, Hampton, VA 23667                |                                                         | <b>MVP Local Site Investigators</b>                                                        |
| Michael                           | Godschalk  |                       | M.D.             | Richmond VA Medical Center             | 1201 Broad Rock Blvd., Richmond, VA 23249                |                                                         | <b>MVP Local Site Investigators</b>                                                        |
| Zuhair                            | Ballas     |                       | M.D.             | Iowa City VA Health Care System        | 601 Highway 6 West, Iowa City, IA 52246-2208             |                                                         | <b>MVP Local Site Investigators</b>                                                        |
| Douglas                           | Ivins      |                       | M.D.             | Eastern Oklahoma VA Health Care System | 1011 Honor Heights Drive, Muskogee, OK 74401             |                                                         | <b>MVP Local Site Investigators</b>                                                        |
| Stephen                           | Mastorides |                       | M.D.             | James A. Haley Veterans' Hospital      | 13000 Bruce B. Downs Blvd, Tampa, FL 33612               |                                                         | <b>MVP Local Site Investigators</b>                                                        |
| Jonathan                          | Moorman    |                       | M.D., Ph.D.      | James H. Quillen VA Medical Center     | Corner of Lamont & Veterans Way, Mountain Home, TN 37684 |                                                         | <b>MVP Local Site Investigators</b>                                                        |
| Saib                              | Gappy      |                       | M.D.             | John D. Dingell VA Medical Center      | 4646 John R Street, Detroit, MI 48201                    |                                                         | <b>MVP Local Site Investigators</b>                                                        |
| Jon                               | Klein      |                       | M.D., Ph.D.      | Louisville VA Medical Center           | 800 Zorn Avenue, Louisville, KY 40206                    |                                                         | <b>MVP Local Site Investigators</b>                                                        |
| Nora                              | Ratcliffe  |                       | M.D.             | Manchester VA Medical Center           | 718 Smyth Road, Manchester, NH 03104                     |                                                         | <b>MVP Local Site Investigators</b>                                                        |
| Hermes                            | Florez     |                       | M.D., Ph.D.      | Miami VA Health Care System            | 1201 NW 16th Street, 11 GRC, Miami FL 33125              |                                                         | <b>MVP Local Site Investigators</b>                                                        |

## Supplemental Online Content: Nonauthor Collaborators

\*First name, last name, and suffix (if applicable) are required and will appear in PubMed.

| *First Name and Middle Initial(s) | *Last Name    | *Suffix (eg, Jr, III) | Academic Degrees | Institution                          | Location (city, state/province, country)                | Role or Contribution, eg, chair, principal investigator | Group (if more than 1 Group listed in the byline) and/or Subgroup (eg, Steering Committee) |
|-----------------------------------|---------------|-----------------------|------------------|--------------------------------------|---------------------------------------------------------|---------------------------------------------------------|--------------------------------------------------------------------------------------------|
| Olaoluwa                          | Okusaga       |                       | M.D.             | Michael E. DeBakey VA Medical Center | 2002 Holcombe Blvd, Houston, TX 77030                   |                                                         | <b>MVP Local Site Investigators</b>                                                        |
| Maureen                           | Murdoch       |                       | M.D., M.P.H.     | Minneapolis VA Health Care System    | One Veterans Drive, Minneapolis, MN 55417               |                                                         | <b>MVP Local Site Investigators</b>                                                        |
| Peruvemba                         | Sriram        |                       | M.D.             | N. FL/S. GA Veterans Health System   | 1601 SW Archer Road, Gainesville, FL 32608              |                                                         | <b>MVP Local Site Investigators</b>                                                        |
| Shing S                           | Yeh           |                       | Ph.D.            | Northport VA Medical Center          | 79 Middleville Road, Northport, NY 11768                |                                                         | <b>MVP Local Site Investigators</b>                                                        |
| Neeraj                            | Tandon        |                       | M.D.             | Overton Brooks VA Medical Center     | 510 East Stoner Ave, Shreveport, LA 71101               |                                                         | <b>MVP Local Site Investigators</b>                                                        |
| Darshana                          | Jhala         |                       | M.D.             | Philadelphia VA Medical Center       | 3900 Woodland Avenue, Philadelphia, PA 19104            |                                                         | <b>MVP Local Site Investigators</b>                                                        |
| Samuel                            | Aguayo        |                       | M.D.             | Phoenix VA Health Care System        | 650 E. Indian School Road, Phoenix, AZ 85012            |                                                         | <b>MVP Local Site Investigators</b>                                                        |
| David                             | Cohen         |                       | M.D.             | Portland VA Medical Center           | 3710 SW U.S. Veterans Hospital Road, Portland, OR 97239 |                                                         | <b>MVP Local Site Investigators</b>                                                        |
| Satish                            | Sharma        |                       | M.D.             | Providence VA Medical Center         | 830 Chalkstone Avenue, Providence, RI 02908             |                                                         | <b>MVP Local Site Investigators</b>                                                        |
| Suthat                            | Liangpunsakul |                       | M.D., M.P.H.     | Richard Roudebush VA Medical Center  | 1481 West 10th Street, Indianapolis, IN 46202           |                                                         | <b>MVP Local Site Investigators</b>                                                        |
| Kris A                            | Oursler       |                       | M.D.             | Salem VA Medical Center              | 1970 Roanoke Blvd, Salem, VA 24153                      |                                                         | <b>MVP Local Site Investigators</b>                                                        |
| Mary                              | Whooley       |                       | M.D.             | San Francisco VA Health Care System  | 4150 Clement Street, San Francisco, CA 94121            |                                                         | <b>MVP Local Site Investigators</b>                                                        |

## Supplemental Online Content: Nonauthor Collaborators

\*First name, last name, and suffix (if applicable) are required and will appear in PubMed.

| *First Name and Middle Initial(s) | *Last Name | *Suffix (eg, Jr, III) | Academic Degrees | Institution                                     | Location (city, state/province, country)            | Role or Contribution, eg, chair, principal investigator | Group (if more than 1 Group listed in the byline) and/or Subgroup (eg, Steering Committee) |
|-----------------------------------|------------|-----------------------|------------------|-------------------------------------------------|-----------------------------------------------------|---------------------------------------------------------|--------------------------------------------------------------------------------------------|
| Sunil                             | Ahuja      |                       | M.D.             | South Texas Veterans Health Care System         | 7400 Merton Minter Boulevard, San Antonio, TX 78229 |                                                         | <b>MVP Local Site Investigators</b>                                                        |
| Joseph                            | Constans   |                       | Ph.D.            | Southeast Louisiana Veterans Health Care System | 2400 Canal Street, New Orleans, LA 70119            |                                                         | <b>MVP Local Site Investigators</b>                                                        |
| Paul                              | Meyer      |                       | M.D., Ph.D.      | Southern Arizona VA Health Care System          | 3601 S 6th Avenue, Tucson, AZ 85723                 |                                                         | <b>MVP Local Site Investigators</b>                                                        |
| Jennifer                          | Greco      |                       | M.D.             | Sioux Falls VA Health Care System               | 2501 W 22nd Street, Sioux Falls, SD 57105           |                                                         | <b>MVP Local Site Investigators</b>                                                        |
| Michael                           | Rauchman   |                       | M.D.             | St. Louis VA Health Care System                 | 915 North Grand Blvd, St. Louis, MO 63106           |                                                         | <b>MVP Local Site Investigators</b>                                                        |
| Richard                           | Servatius  |                       | Ph.D.            | Syracuse VA Medical Center                      | 800 Irving Avenue, Syracuse, NY 13210               |                                                         | <b>MVP Local Site Investigators</b>                                                        |
| Melinda                           | Gaddy      |                       | Ph.D.            | VA Eastern Kansas Health Care System            | 4101 S 4th Street Trafficway, Leavenworth, KS 66048 |                                                         | <b>MVP Local Site Investigators</b>                                                        |
| Agnes                             | Wallbom    |                       | M.D., M.S.       | VA Greater Los Angeles Health Care System       | 11301 Wilshire Blvd, Los Angeles, CA 90073          |                                                         | <b>MVP Local Site Investigators</b>                                                        |
| Timothy                           | Morgan     |                       | M.D.             | VA Long Beach Healthcare System                 | 5901 East 7th Street Long Beach, CA 90822           |                                                         | <b>MVP Local Site Investigators</b>                                                        |
| Todd                              | Stapley    |                       | D.O.             | VA Maine Healthcare System                      | 1 VA Center, Augusta, ME 04330                      |                                                         | <b>MVP Local Site Investigators</b>                                                        |
| Scott                             | Sherman    |                       | M.D., M.P.H.     | VA New York Harbor Healthcare System            | 423 East 23rd Street, New York, NY 10010            |                                                         | <b>MVP Local Site Investigators</b>                                                        |
| George                            | Ross       |                       | M.D.             | VA Pacific Islands Health Care System           | 459 Patterson Rd, Honolulu, HI 96819                |                                                         | <b>MVP Local Site Investigators</b>                                                        |



## Supplemental Online Content: Nonauthor Collaborators

\*First name, last name, and suffix (if applicable) are required and will appear in PubMed.

| *First Name and Middle Initial(s) | *Last Name | *Suffix (eg, Jr, III) | Academic Degrees | Institution                                     | Location (city, state/province, country)           | Role or Contribution, eg, chair, principal investigator | Group (if more than 1 Group listed in the byline) and/or Subgroup (eg, Steering Committee) |
|-----------------------------------|------------|-----------------------|------------------|-------------------------------------------------|----------------------------------------------------|---------------------------------------------------------|--------------------------------------------------------------------------------------------|
| Philip                            | Tsao       |                       | Ph.D.            | VA Palo Alto Health Care System                 | 3801 Miranda Avenue, Palo Alto, CA 94304-1290      |                                                         | <b>MVP Local Site Investigators</b>                                                        |
| Patrick                           | Stollo     |                       | Jr.M.D.          | VA Pittsburgh Health Care System                | University Drive, Pittsburgh, PA 15240             |                                                         | <b>MVP Local Site Investigators</b>                                                        |
| Edward                            | Boyko      |                       | M.D.             | VA Puget Sound Health Care System               | 1660 S. Columbian Way, Seattle, WA 98108-1597      |                                                         | <b>MVP Local Site Investigators</b>                                                        |
| Laurence                          | Meyer      |                       | M.D., Ph.D.      | VA Salt Lake City Health Care System            | 500 Foothill Drive, Salt Lake City, UT 84148       |                                                         | <b>MVP Local Site Investigators</b>                                                        |
| Samir                             | Gupta      |                       | M.D., M.S.C.S.   | VA San Diego Healthcare System                  | 3350 La Jolla Village Drive, San Diego, CA 92161   |                                                         | <b>MVP Local Site Investigators</b>                                                        |
| Mostaqul                          | Huq        |                       | Pharm.D., Ph.D.  | VA Sierra Nevada Health Care System             | 975 Kirman Avenue, Reno, NV 89502                  |                                                         | <b>MVP Local Site Investigators</b>                                                        |
| Joseph                            | Fayad      |                       | M.D.             | VA Southern Nevada Healthcare System            | 6900 North Pecos Road, North Las Vegas, NV 89086   |                                                         | <b>MVP Local Site Investigators</b>                                                        |
| Adriana                           | Hung       |                       | M.D., M.P.H.     | VA Tennessee Valley Healthcare System           | 1310 24th Avenue, South Nashville, TN 37212        |                                                         | <b>MVP Local Site Investigators</b>                                                        |
| Jack                              | Lichy      |                       | M.D., Ph.D.      | Washington DC VA Medical Center                 | 50 Irving St, Washington, D. C. 20422              |                                                         | <b>MVP Local Site Investigators</b>                                                        |
| Robin                             | Hurley     |                       | M.D.             | W.G. (Bill) Hefner VA Medical Center            | 1601 Brenner Ave, Salisbury, NC 28144              |                                                         | <b>MVP Local Site Investigators</b>                                                        |
| Brooks                            | Robey      |                       | M.D.             | White River Junction VA Medical Center          | 163 Veterans Drive, White River Junction, VT 05009 |                                                         | <b>MVP Local Site Investigators</b>                                                        |
| Robert                            | Striker    |                       | M.D., Ph.D.      | William S. Middleton Memorial Veterans Hospital | 2500 Overlook Terrace, Madison, WI 53705           |                                                         | <b>MVP Local Site Investigators</b>                                                        |
